# Supplementary material
Source: Springer Nature journal article supplement (https://www.springermedizin.de/resource/supplementary/12874_2013_967_MOESM4_ESM.pdf/9433268)

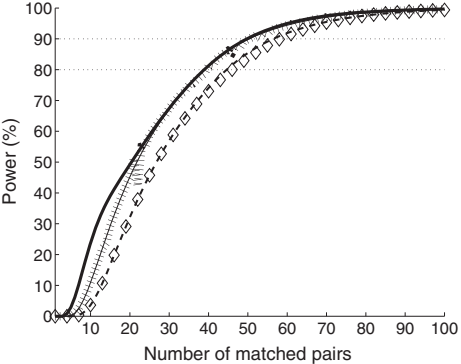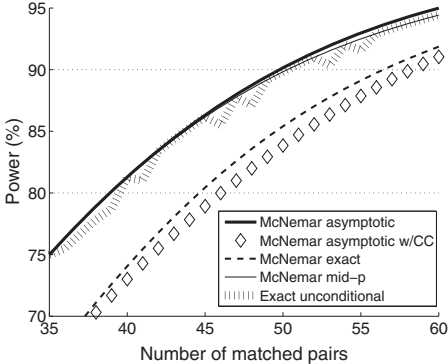

Supplement: MOESM4 [file 9433268]
